# Supplementary material
Source: PubMed Central journal article supplement (PMC8801205)
Supplement: NIHMS1763008-supplement-Materials_List.pdf [file NIHMS1763008-supplement-Materials_List.pdf]

Materials List for:

# Identifying Per- and Polyfluorinated Chemical Species with a Combined Targeted and Non-Targeted-Screening High-Resolution Mass Spectrometry Workflow

James McCord<sup>1</sup>, Mark Strynar<sup>2</sup>

<sup>1</sup>Oak Ridge Institute for Science and Education, National Exposure Research Laboratory, U.S. Environmental Protection Agency

<sup>2</sup>National Exposure Research Laboratory, U.S. Environmental Protection Agency

Correspondence to: Mark Strynar at [strynar.mark@epa.gov](mailto:strynar.mark@epa.gov)

URL: <https://www.jove.com/video/59142>

DOI: [doi:10.3791/59142](https://doi.org/10.3791/59142)

## Materials

| Name                                                       | Company                  | Catalog Number | Comments                                                                                                                                                                       |
|------------------------------------------------------------|--------------------------|----------------|--------------------------------------------------------------------------------------------------------------------------------------------------------------------------------|
| Acqity ultra-high performance liquid chromatography system | Waters Corporation       |                | Modified with PFCs analysis kit (176001744); equivalent UPLC system is acceptable if PFAS background is checked and confirmed to be low                                        |
| Ammonium acetate                                           | Fluka                    | 17836          | Mass spectrometry grade>99% pure                                                                                                                                               |
| Ammonium Hydroxide                                         | Sigma-Aldrich            | 338818         |                                                                                                                                                                                |
| Balance                                                    | Mettler                  | AB204S         |                                                                                                                                                                                |
| BEH C18 reverse phase UPLC column, 2.1×50 mm, 1.7 μm       | Waters Corporation       | 186002350      |                                                                                                                                                                                |
| Dual piston syringe pump                                   | Waters Corporation       | SPC10-C        |                                                                                                                                                                                |
| Glacial Acetic Acid                                        | Sigma-Aldrich            | ARK2183        |                                                                                                                                                                                |
| Glass Microfiber Filters                                   | Whatman                  | 1820-070       |                                                                                                                                                                                |
| High density polyethylene sample bottle                    | Nalgene                  | 2189-0032      |                                                                                                                                                                                |
| High Resolution Mass Spectrometer                          | Various                  |                | Mass Spectrometer should be capable of providing accurate mass to <10ppm and collecting MS/MS data. Agilent 6530 qTOF and Thermo Fisher Orbitrap Fusion were used in this work |
| Methanol                                                   | Sigma-Aldrich            |                |                                                                                                                                                                                |
| Nitric Acid (35% w/w)                                      | Thermo Fisher Scientific | SVCN-5-1       | Can be prepared in house using concentrated nitric acid and reagent water                                                                                                      |
| Polypropylene Buchner funnel                               | ACE Glass                | 12557-09       |                                                                                                                                                                                |
| Polypropylene centrifuge tube and cap                      | BD Falcon                | 352096         |                                                                                                                                                                                |
| Polypropylene Vacuum Flask (1 L)                           | Nalgene                  | DS4101-1000    |                                                                                                                                                                                |
| Quattro Premier XE triple quadrupole mass spectrometer     | Waters Corporation       |                | Equivalent triple-quadrupole or better system can be used instead, should provide high sensitivity and stability for targeted analysis                                         |
| Reagent Water                                              |                          |                | Any source determined to be PFAS free                                                                                                                                          |
| Sodium Acetate                                             | Sigma-Aldrich            | W302406        |                                                                                                                                                                                |

|                                                                                  |                       |           |                                                                                                                 |
|----------------------------------------------------------------------------------|-----------------------|-----------|-----------------------------------------------------------------------------------------------------------------|
| TurboVap nitrogen evaporator                                                     | Caliper Life Sciences | 103198    | Equivalent systems or rotary vacuum evaporator may be used instead                                              |
| Weak anion exchange SPE cartridge (Oasis WAX Plus)                               | Waters Corporation    | 186003519 |                                                                                                                 |
| <b>Standard Solutions</b>                                                        |                       |           |                                                                                                                 |
| 2,3,3,3-Tetrafluoro-2-(1,1,2,2,3,3,3-heptafluoropropoxy)propanoic acid (HFPO-DA) | Wellington            | HFPO-DA   |                                                                                                                 |
| Additional targeted compound standards of interest                               |                       |           | to be determined based on preliminary analysis and standard availability                                        |
| Mass labeled HFPO-DA                                                             | Wellington            | M2HFPO-DA |                                                                                                                 |
| Native PFCA/PFAS Mixture (2 ug/mL)                                               | Wellington            | PFAC-MXA  | or PFAC-MXB; or individually prepared mixture containing compounds of interest                                  |
| Stable Isotope Labeled PFCA/PFAS Mixture (2 ug/mL)                               | Wellington            | MPFAC-MXA | or MPFAC-MXB; or individually prepared mixture containing compounds of interest as appropriate for Native PFASs |
| <b>Software</b>                                                                  |                       |           |                                                                                                                 |
| Mass Profiler Professional                                                       | Agilent               |           | Or open source software packages                                                                                |
| Profinder                                                                        | Agilent               |           | Or open source software packages                                                                                |
